# Supplementary material
Source: PubMed Central journal article supplement (PMC4135843)
Supplement: AAC.03154-14_zac009143196so1.pdf [file AAC.03154-14_zac009143196so1.pdf]

# Pyochelin potentiates the inhibitory activity of gallium on *Pseudomonas aeruginosa*

by Frangipani E., Bonchi C., Minandri F., Imperi F., and Visca P.

## SUPPLEMENTAL MATERIAL

**TABLE S1.** Strains, plasmids and oligonucleotides used in this study

| Strains                       | Relevant characteristics                                                                                                        | Reference or source     |
|-------------------------------|---------------------------------------------------------------------------------------------------------------------------------|-------------------------|
| <i>E. coli</i>                |                                                                                                                                 |                         |
| DH5 $\alpha$                  | <i>recA1 endA1 hsdR17 supE44 thi-1 gyrA96 relA1</i><br>$\Delta(lacZYA-argF)U169 [\phi 80\Delta lacZ\Delta M15] F^- NaI^r$       | 1                       |
| SM10                          | <i>thi-1 thr leu tonA lacY supE recA::RP4-2-Tc::Mu</i><br>Km <sup>R</sup>                                                       | 2                       |
| S17.1 $\lambda$ pir           | Tp <sup>R</sup> Sm <sup>R</sup> <i>recA, thi, pro, hsdR-M+RP4:</i><br>Tc:Mu:KmTn7 $\lambda$ pir                                 | 2-3                     |
| HB101                         | <i>proA2 hsdS20 (rb<sup>-</sup> mb<sup>-</sup>) recA13 ara-14 lacY1 galk2</i><br><i>rpsL20 supE44 xyl-5 mtl-1 F<sup>-</sup></i> | 1                       |
| <i>P. aeruginosa</i>          |                                                                                                                                 |                         |
| PAO1 (ATCC15692)              | Wild type                                                                                                                       | 4                       |
| PAO1 $\Delta pchD$            | PAO1 carrying a deletion in <i>pchD</i>                                                                                         | This study              |
| PAO1 $\Delta pvdA$            | PAO1 carrying a deletion in <i>pvdA</i>                                                                                         | 5                       |
| PAO1 $\Delta pvdA\Delta pchD$ | PAO1 carrying a deletion in <i>pvdA</i> and <i>pchD</i>                                                                         | This study              |
| PAO1 $\Delta fptX$            | PAO1 carrying a deletion in <i>fptX</i>                                                                                         | This study              |
| PAO1 $\Delta fptAX$           | PAO1 carrying a deletion in <i>fptABCX</i>                                                                                      | This study              |
| TR1                           | Clinical isolate                                                                                                                | 6                       |
| TR1 $\Delta pvdA$             | TR1 carrying a deletion in <i>pvdA</i>                                                                                          | This study              |
| <b>Plasmids</b>               |                                                                                                                                 |                         |
| pRK2013                       | Helper plasmid; Tra <sup>+</sup> Km <sup>R</sup>                                                                                | 7                       |
| pEX18Tc                       | Suicide vector for allelic replacement; Tc <sup>R</sup>                                                                         | 8                       |
| pPS858                        | Source of Gm <sup>R</sup> -GFP cassette; Ap <sup>R</sup>                                                                        | 8                       |
| pME3087                       | Suicide vector for allelic replacement; Tc <sup>R</sup>                                                                         | 9                       |
| pDM4                          | Suicide vector for allelic replacement; Cm <sup>R</sup>                                                                         | 10                      |
| pME $\Delta fptX$             | pME3087 derivative for <i>fptX</i> deletion; Tc <sup>R</sup>                                                                    | This study              |
| pME $\Delta fptAX$            | pME3087 derivative for <i>fptABCX</i> deletion; Tc <sup>R</sup>                                                                 | This study              |
| pEX $\Delta pvdA$             | pEX18Tc derivative for <i>pvdA</i> deletion; Tc <sup>R</sup>                                                                    | 5                       |
| pDM4 $\Delta pchD$            | pDM4 derivative for <i>pchD</i> deletion; Cm <sup>R</sup>                                                                       | This study              |
| <b>Oligonucleotides</b>       |                                                                                                                                 |                         |
|                               | <b>Sequence (5' <math>\rightarrow</math> 3')<sup>a</sup></b>                                                                    | <b>Restriction site</b> |
| pchDmutUPFW                   | GCTCTAGAGCCCGGGCGCTGCCG                                                                                                         | XbaI                    |
| pchDmutUPRV                   | CGGAATTCGACGAAGGCGATGCCG                                                                                                        | EcoRI                   |
| pchDmutDWFV                   | CGGAATTCGCCAAACCGGCATCG                                                                                                         | EcoRI                   |
| pchDmutDWRV                   | CCGCTCGAGTAGCTCGCTGGC                                                                                                           | XhoI                    |
| fptAUPFW                      | CCCGAATTCCTGCTGGGTGGCGTG                                                                                                        | EcoRI                   |
| fptAUPRV                      | AAGGGATCCGTTTTTCATCGTTCGAAC                                                                                                     | BamHI                   |
| fptAXDWFV                     | CCCGGATCCCTGAGGCGCTGCCGATA                                                                                                      | BamHI                   |
| fptAXDWRV                     | GCCAAGCTTCCATTCGGCGGTCCGC                                                                                                       | HindIII                 |
| fptXUPFW                      | GGGGAATTCGGCGAGCGCAGCTCG                                                                                                        | EcoRI                   |

|                  |                                     |         |
|------------------|-------------------------------------|---------|
| fptXUPRV         | <u>CCCGGATCC</u> AGCTCAAGCATGGTGGTC | BamHI   |
| mutPA4687UP_FW   | CCCAAGCTT <u>CCGCATCGT</u> CCTCG    | HindIII |
| mutPA4687UP_RV   | CCCGGATCCAGGGCGGCGTGGCG             | BamHI   |
| mutPA4687DOWN_FW | CCCGGATCCCTCAGCCTCGAACGCG           | BamHI   |
| mutPA4687DOWN_RV | CCCGAATT <u>CGAACTCCTGGT</u> AGATGG | EcoRI   |

<sup>a</sup> Restriction sites are underlined

7  
8

9

10

## Supplemental Experimental Procedures

11

### Construction of plasmids and gene replacement *P. aeruginosa* mutants

12

For the generation of the *P. aeruginosa* PAO1 $\Delta$ *pchD* mutant, site-specific excision of the

13

entire *pchD* coding sequence was performed using a *sacB*-based strategy described by

14

Milton *et al.* (1996). Briefly, two regions of approximately 500 bp upstream and

15

downstream of the *pchD* gene were generated by PCR with primer pairs

16

*pchDmutUPFW/pchDmutUPRV* and *pchDmutDWFw/pchDmutDWRV*, respectively (Table

17

S1). Upstream and downstream fragments were digested with appropriate restriction

18

enzymes, and directionally ligated to the pDM4 suicide vector (10). The resulting

19

pDM4 $\Delta$ *pchD* construct was introduced in *Escherichia coli* S17.1 $\lambda$ pir and conjugally

20

transferred into *P. aeruginosa* PAO1. Merodiploides were resolved as described (10). The

21

deletion event was verified by PCR and DNA sequencing, and the resulting mutant was

22

named PAO1 $\Delta$ *pchD*.

23

The *P. aeruginosa* TR1 strain deleted of the *pvdA* gene was obtained using plasmid

24

pEX $\Delta$ *pvdA*, as described (5).

25

For the deletion of *fptX* and the *fptABCX* operon in the *P. aeruginosa* PAO1 chromosome,

26

fragments of approximately 700 pb upstream and downstream of the *fptX* gene or the

27

*fptABCX* operon were amplified by PCR using the primer couples *fptXUPFW/fptXUPRV* and

28

*fptAXDWFw/fptAXDWRV* or *fptAUPFW/fptAUPRV* and *fptAXDWFw/fptAXDWRV*,

29 respectively (Table S1). The PCR products were digested with the suitable restriction  
30 enzymes and cloned into the suicide vector pME3087 (9), yielding plasmid pME $\Delta$ fptX and  
31 pME $\Delta$ fptAX, respectively. These plasmids were then introduced into *P. aeruginosa* PAO1 by  
32 triparental mating, using the helper strain *E. coli* HB101(pRK2013). Merodiploids were  
33 resolved as previously described (11). The deletion events were verified by PCR and DNA  
34 sequencing, and the resulting strains were named PAO1 $\Delta$ fptX and PAO1 $\Delta$ fptAX.

35

36

### 37 **Supplemental References**

38

- 39 1. **Sambrook J, Fritsch EF, Maniatis T.** 1989. Molecular cloning: a laboratory manual. Cold  
40 Spring Harbor, NY: Cold Spring Harbor Laboratory Press.
- 41 2. **de Lorenzo V, Timmis KN.** 1994. Analysis and construction of stable phenotypes in  
42 gram-negative bacteria with Tn5- and Tn10-derived mini transposons. *Methods*  
43 *Enzymol.* **235**:386-405.
- 44 3. **Simon R, Priefer U, Puhler A.** 1983. A broad host range mobilization system for in vivo  
45 genetic engineering: Transposon mutagenesis in Gram-negative bacteria.  
46 *Biotechnology (NY)* **1**:784-791.
- 47 4. **Holloway BW, Krishnapillai V, Morgan AF.** 1979. Chromosomal genetics of  
48 *Pseudomonas*. *Microbiol. Rev.* **43**:73-102.
- 49 5. **Imperi F, Putignani L, Tiburzi F, Ambrosi C, Cipollone R, Ascenzi P, Visca P.** 2008.  
50 Membrane-association determinants of the omega-amino acid monooxygenase PvdA, a  
51 pyoverdine biosynthetic enzyme from *Pseudomonas aeruginosa*. *Microbiology*  
52 **154**:2804-2813.

- 53 6. **Bragonzi A, Paroni M, Nonis A, Cramer N, Montanari S, Rejman J, Di Serio C, Döring G,**  
54 **Tümmler B.** 2009. *Pseudomonas aeruginosa* microevolution during cystic fibrosis lung  
55 infection establishes clones with adapted virulence. *Am. J. Respir. Crit. Care Med.*  
56 **180:138-145.**
- 57 7. **Ditta G, Schmidhauser T, Yakobson E, Lu P, Liang XW, Finlay DR, Guiney D, Helinski**  
58 **DR.** 1985. Plasmids related to the broad host range vector, pRK290, useful for gene  
59 cloning and for monitoring gene expression. *Plasmid* **13:149-153.**
- 60 8. **Hoang TT, Karkhoff-Schweizer RR, Kutchma AJ, Schweizer HP.** 1998. A broad-host-  
61 range Flp-FRT recombination system for site-specific excision of chromosomally-located  
62 DNA sequences: application for isolation of unmarked *Pseudomonas aeruginosa*  
63 mutants. *Gene* **212:77-86.**
- 64 9. **Voisard C, Bull CT, Keel C, Laville J, Maurhofer M, Schnider U, Défago G, Haas D.** 1994.  
65 Biocontrol of root diseases by *Pseudomonas fluorescens* CHA0: current concepts and  
66 experimental approaches. In *Molecular ecology of rhizosphere microorganisms*. O'Gara  
67 F, Dowling D, Boesten B. (eds). Weinheim, Germany: VCH Publishers, pp. 67-89.
- 68 10. **Milton DL, O'Toole R, Horstedt P, Wolf-Watz H.** 1996. Flagellin A is essential for the  
69 virulence of *Vibrio anguillarum*. *J. Bacteriol.* **178: 1310-1319.**
- 70 11. **Ye RW, Haas D, Ka JO, Krishnapillai V, Zimmermann A, Baird C, Tiedje JM.** 1995.  
71 Anaerobic activation of the entire denitrification pathway in *Pseudomonas aeruginosa*  
72 requires Anr, an analog of Fnr. *J. Bacteriol.* **177:3606-3609.**

73

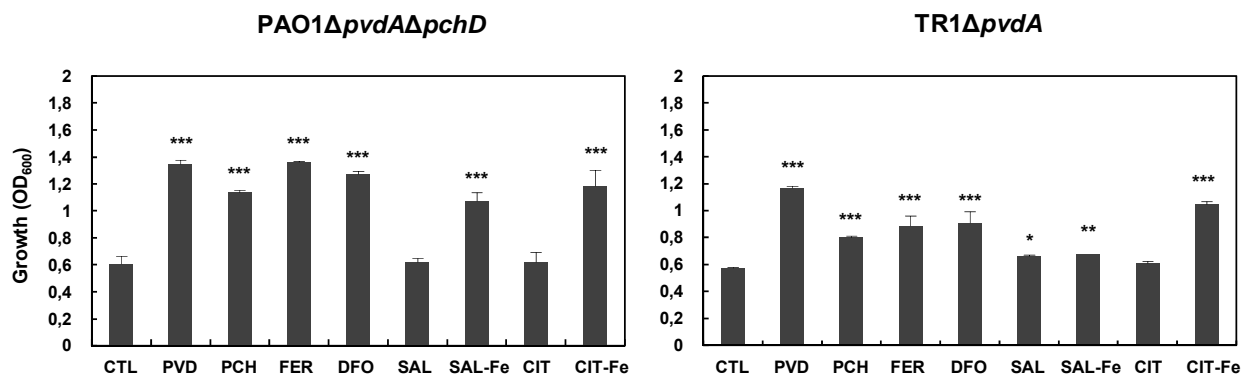

74

75

76

77

78

79

80

81

82

83

84

85

**Fig S1.** Effect of different siderophores and iron chelators on *P. aeruginosa* growth under iron depletion. Bacteria were grown for 24 h at 37°C in M9-succinate minimal medium supplemented with 400 μM 2,2'-dipyridyl and 5 μM FeCl<sub>3</sub> (CTL). Where indicated, the siderophore/iron chelator was supplemented at 20 μM. Abbreviations: pyoverdine (PVD), pyochelin (PCH) ferrichrome (FER), desferrioxamine (DFO), salicylate (SAL), citrate (CIT), citrate-iron complex (CIT-Fe; 2:1 ratio), salicylate-iron complex (SAL-Fe; 3:1 ratio). Growth was measured as OD<sub>600</sub> (y axis). Mean values of three independent experiments ± the standard deviation are shown. Statistically significant differences (ANOVA) relative to the CTL are indicated. \* =  $P < 0.05$ ; \*\* =  $P < 0.01$ ; \*\*\* =  $P < 0.001$ .

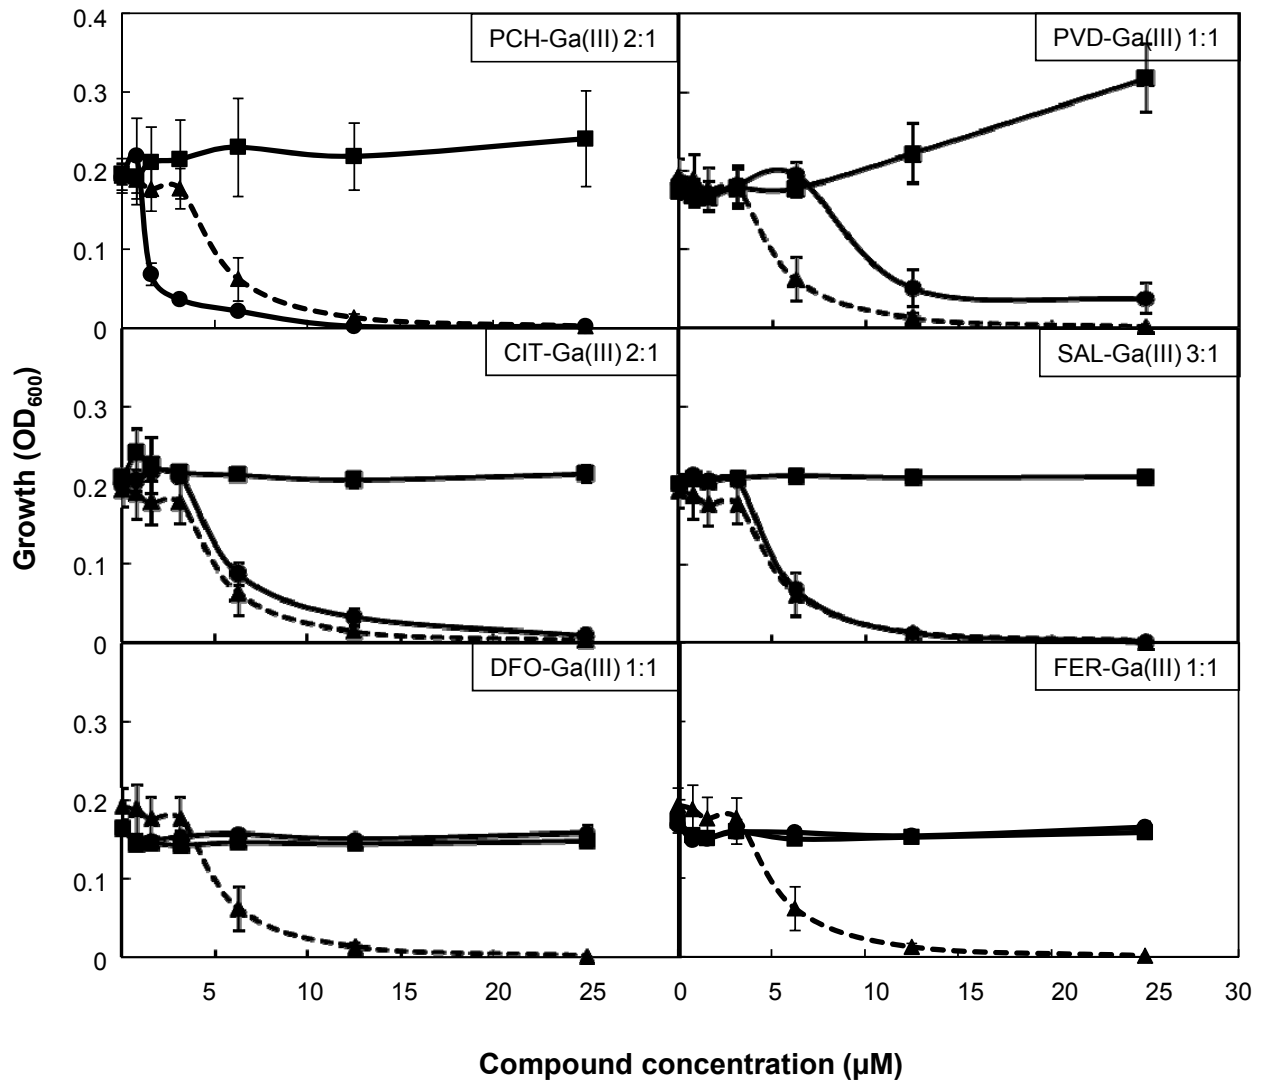

87

88

89

90

91

92

93

94

95

96

**FIG S2.** Effect of Ga(NO<sub>3</sub>)<sub>3</sub> and Ga(III)-complexes on *P. aeruginosa* TR1 growth. Growth (OD<sub>600</sub>) of *P. aeruginosa* TR1 in microtiter plates containing (per well) 200 µl DCAA supplemented with different concentrations of Ga(NO<sub>3</sub>)<sub>3</sub> (triangles, dashed lines), the indicated Ga(III)-chelator complex (circles, solid lines) or the chelator alone as control (squares, solid lines), after 24 h at 37°C. The stoichiometry (binding ratio) of each Ga(III)-chelator complex is indicated in the inset of each panel. Values are the mean of at least two independent experiments ± the standard deviation.

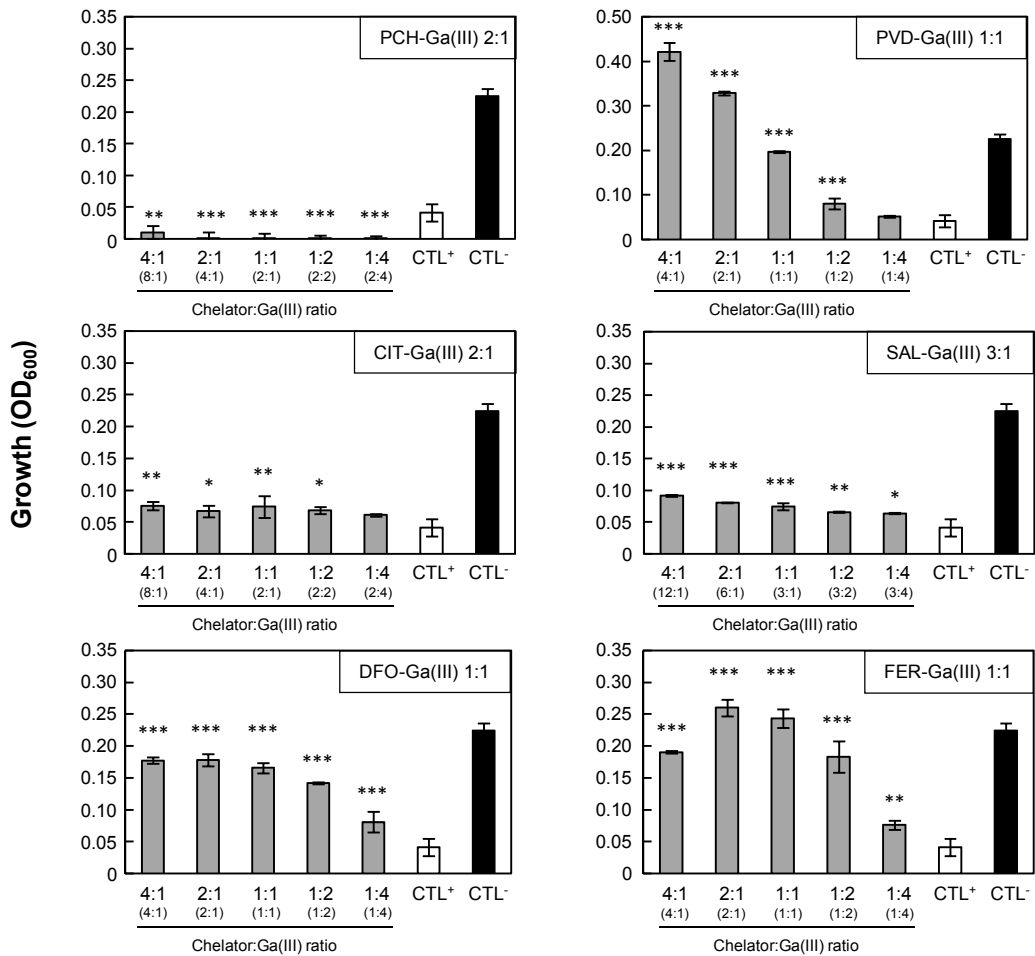

97

98

**FIG S3.** Effect of different chelator:Ga(III) ratios on *P. aeruginosa* TR1 growth. *P. aeruginosa*

99

TR1 was grown for 24 h at 37°C in microtiter plates containing (per well) 200 μl DCAA

100

supplemented with 12.5 μM Ga(NO<sub>3</sub>)<sub>3</sub> and various concentrations of each chelator to

101

obtain different chelator:Ga(III) ratios. The chelator:Ga(III) ratio (x axis) takes into account

102

the binding stoichiometry, as indicated in the inset of each panel. The actual chelator:Ga(III)

103

ratio is given in brackets on the x axis. CTL<sup>+</sup> indicates growth in the presence of 12.5 μM

104

Ga(NO<sub>3</sub>)<sub>3</sub>, while CTL<sup>-</sup> indicates growth without chelators or Ga(NO<sub>3</sub>)<sub>3</sub>. Growth was measured

105

as OD<sub>600</sub> (y axis). Each value is the mean of three independent experiments ± the standard

106

deviation. Statistically significant differences compared to CTL<sup>+</sup> are indicated (ANOVA). \* =

107

P < 0.05; \*\* = P < 0.01; \*\*\* = P < 0.001.
